# Supplementary material
Source: HighWire-hosted journal article supplement (http://ghspjournal.org/highwire/filestream/3045/field_highwire_adjunct_files/0/19-00140-MacNairn-Supplement1.pdf)
Supplement: 19-00140-MacNairn-Supplement1.pdf [file 19-00140-MacNairn-Supplement1.pdf]

## **SUPPLEMENT 1.** Health Volunteers Overseas Collaborating Institutions

### **BHUTAN**

*Mongar*

Eastern Regional Referral Hospital

*Thimphu*

Jigme Dorji Wangchuck National Referral Hospital

Ministry of Health

Royal Institute of Health Sciences

University of Medical Sciences

### **CAMBODIA**

*Kampot*

Sonja Kill Memorial Hospital

*Phnom Penh*

Ciomal Kien Kleng Centre

HOPE Medical Centers

Preah Kossamak Hospital

Sihanouk Hospital Center of HOPE

*Siem Reap*

Angkor Hospital for Children

### **CHINA**

*Wenzhou*

Second Affiliated Hospital of Wenzhou Medical School

### **COSTA RICA**

*San Jose*

Caja Costarricense de Seguro Social System

Costa Rican College of Physicians

University of Costa Rica

### **GHANA**

*Kumasi*

Komfo Anokye Teaching Hospital

*Tamale*

University for Development Studies

### **GUYANA**

*Georgetown*

Georgetown Public Hospital Corporation

### **HAITI**

*Deschappelles*

Hôpital Albert Schweitzer

*Port au Prince*

Faculté d'Odontologie

### **HONDURAS**

*Tegucigalpa*

Cancer Center Emma Callejas

Hospital Escuela

Hospital San Felipe

### **INDIA**

*Bangalore*

Bangalore Baptist Hospital

*Raxaul*

Duncan Hospital

*Vellore*

Christian Medical College

### **LAOS**

*Luang Prabang*

Lao Friends Hospital for Children

*Vientiane*

National University of Laos

### **MALAWI**

*Blantyre*

Malawi College of Medicine

Queen Elizabeth Central Hospital

University of Malawi

### **MYANMAR**

*Yangon*

Yangon General Hospital

Yangon Orthopaedic Hospital

## **NEPAL**

*Bhaktapur*

Bhaktapur Cancer Hospital

*Dhulikhel*

Dhulikhel Hospital

*Kathmandu*

Dermatology Institute Skin Health and Referral Center

Kathmandu Medical College and Teaching Hospital

Kathmandu University

School of Medical Sciences

National Academy of Medical Sciences

Nepal Medical College and Teaching Hospital

*Tansen*

Lumbini Medical College

## **NICARAGUA**

*Managua*

Hospital Escuela Antonio Lenin Fonseca

Hospital Escuela Roberto Calderón Gutierrez

Hospital Fernando Velez Paiz

Hospital Infantil Manuel Jesus Rivera

Hospital Militar Escuela Alejandro Davila

Bolanos

Instituto Politecnico de la Salud

## **PERU**

*Arequipa*

Catholic University of Santa Maria

Carlos Alberto Sequin Escobdo Hospital

Yanahuara Hospital

*Chiclayo*

The Craniofacial Center of Hospital Regional

Docente, Las Mercedes

## **PHILIPPINES**

Manila

Philippine General Hospital

## **RWANDA**

*Kigali*

King Faisal Hospital

Rwanda Physiotherapy Association

University of Rwanda—School of Health Sciences, College of Medicine and Health Sciences

## **ST. LUCIA**

*Vieux Fort*

St. Jude Hospital

## **TANZANIA**

*Dar es Salaam*

Muhimbili National Hospital

Muhimbili University of Health and Allied Sciences

Tanzanian Dental Association

*Moshi*

Kilimanjaro Christian Medical Center

*Mwanza*

Weill Bugando Medical Centre

## **UGANDA**

*Kabale*

Kabale Regional Referral Hospital

Kabale University School of Medicine

*Kampala*

Makerere University

Mulago National Referral Hospital

*Mbarara*

Mbarara University of Science and Technology

Mbarara University Teaching Hospital

## **VIETNAM**

*Da Nang*

Da Nang Orthopedic and Rehabilitation Hospital

Da Nang University of Medical Technology and Pharmacy

*Hai Duong*

Hai Duong Medical and Technical University

*Ho Chi Minh City*

Hospital for Traumatology and Orthopaedics

*Hue*

Hue University of Medicine and Pharmacy
